# Supplementary figures and images for: Towards a comprehensive structural variation map of an individual human genome
Source: Springer Nature journal article supplement (doi:10.1186/gb-2010-11-5-r52), 2010-05-19

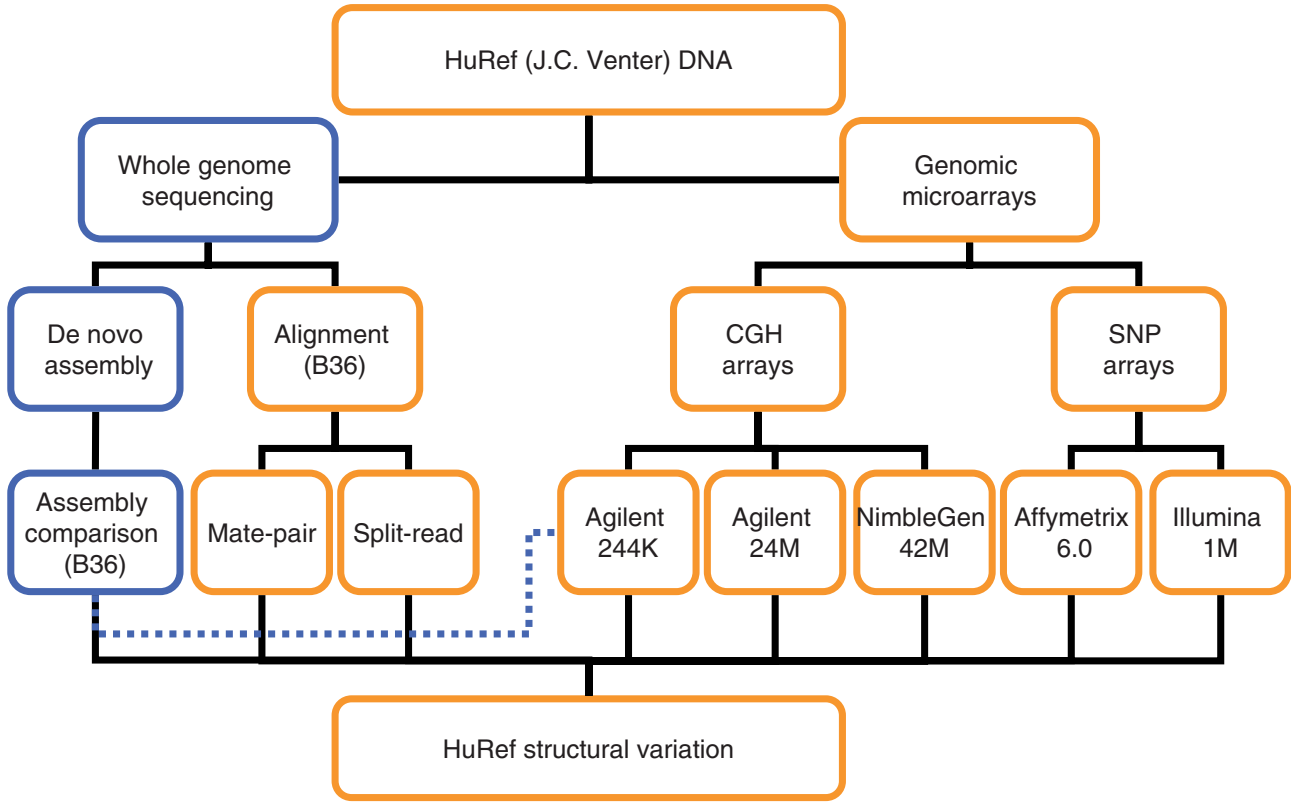

Supplement: 13059_2010_2345_MOESM28_ESM.pdf [file 13059_2010_2345_MOESM28_ESM.pdf]

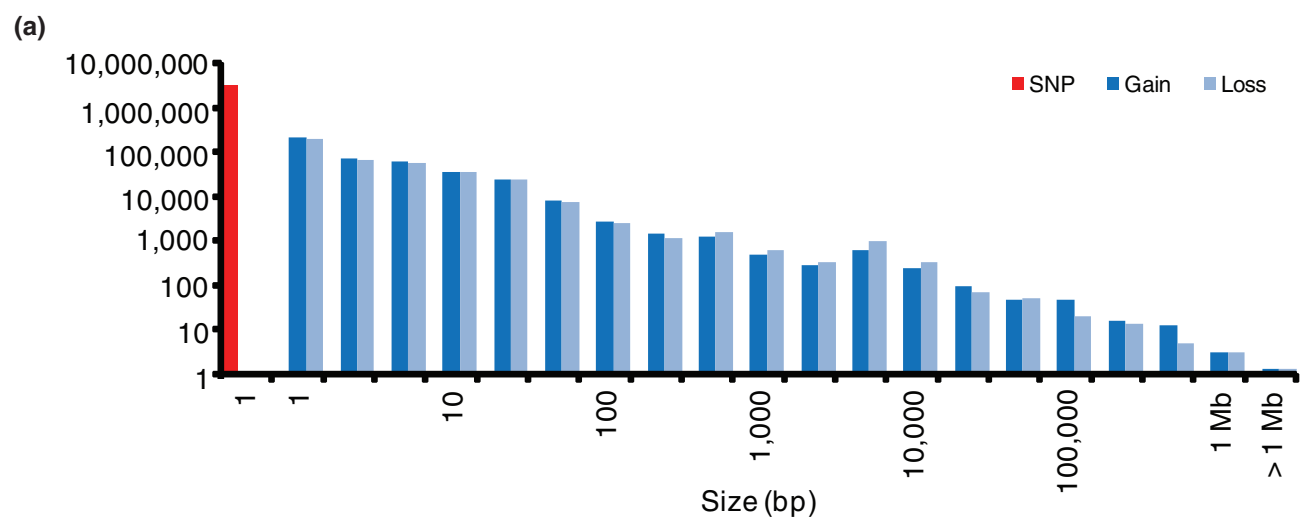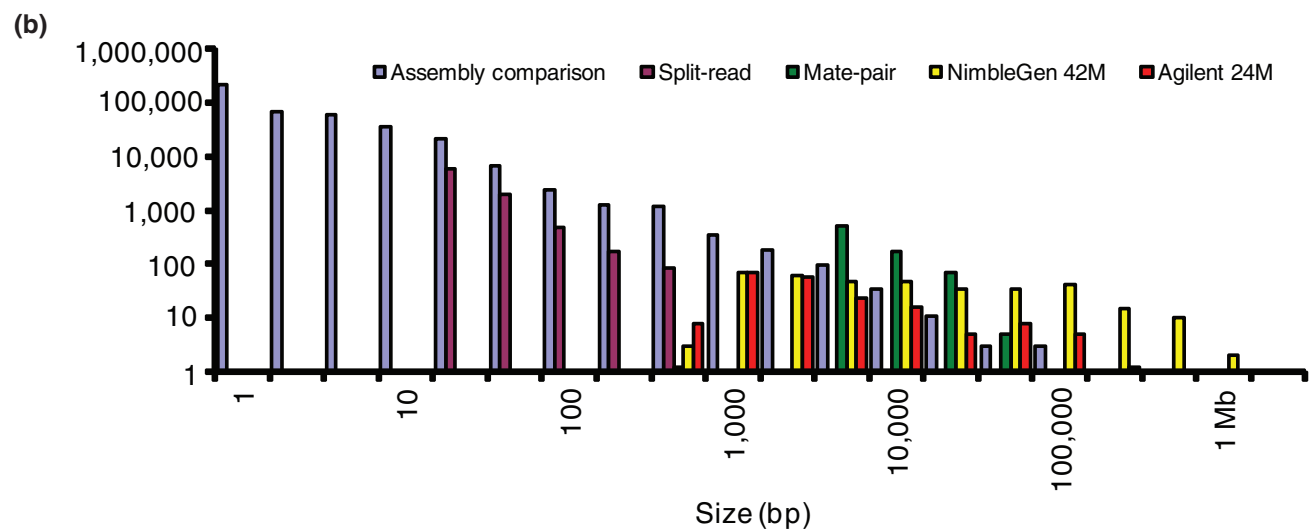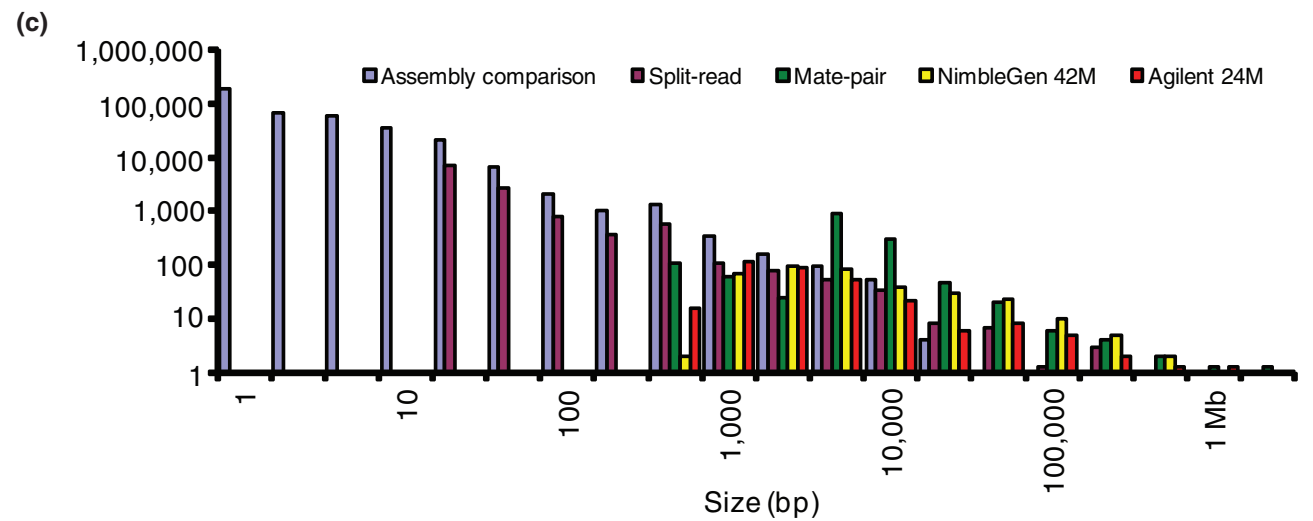

Supplement: 13059_2010_2345_MOESM29_ESM.pdf [file 13059_2010_2345_MOESM29_ESM.pdf]

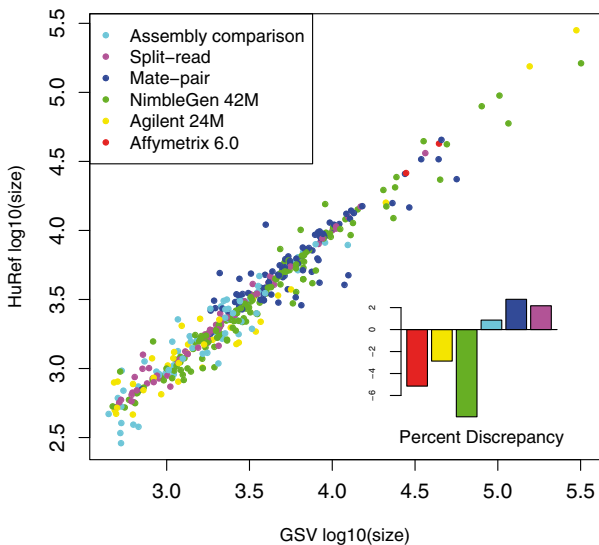

Supplement: 13059_2010_2345_MOESM30_ESM.pdf [file 13059_2010_2345_MOESM30_ESM.pdf]

**(a)**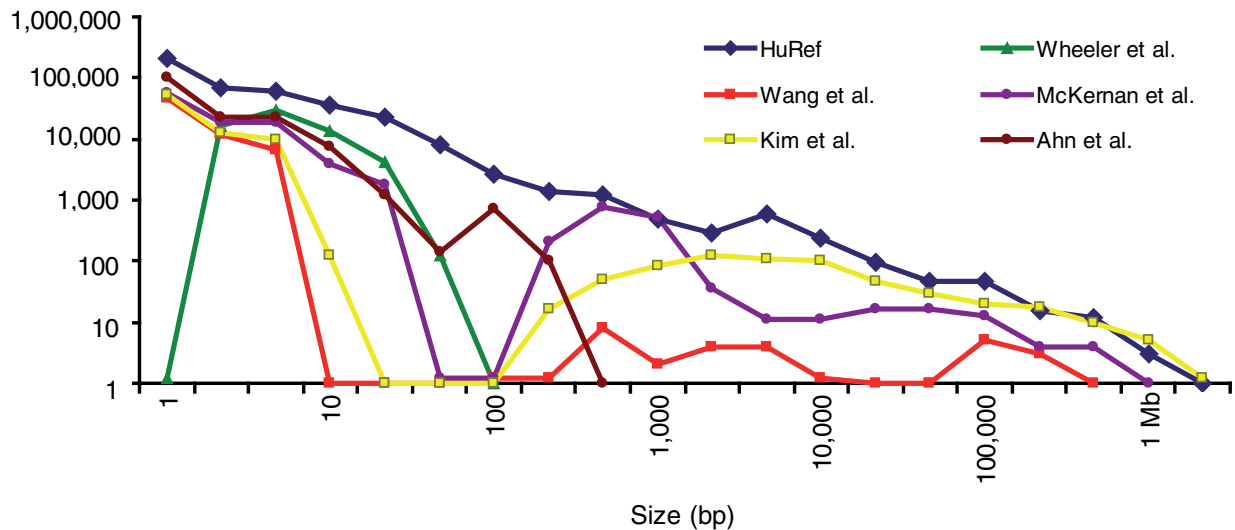**(b)**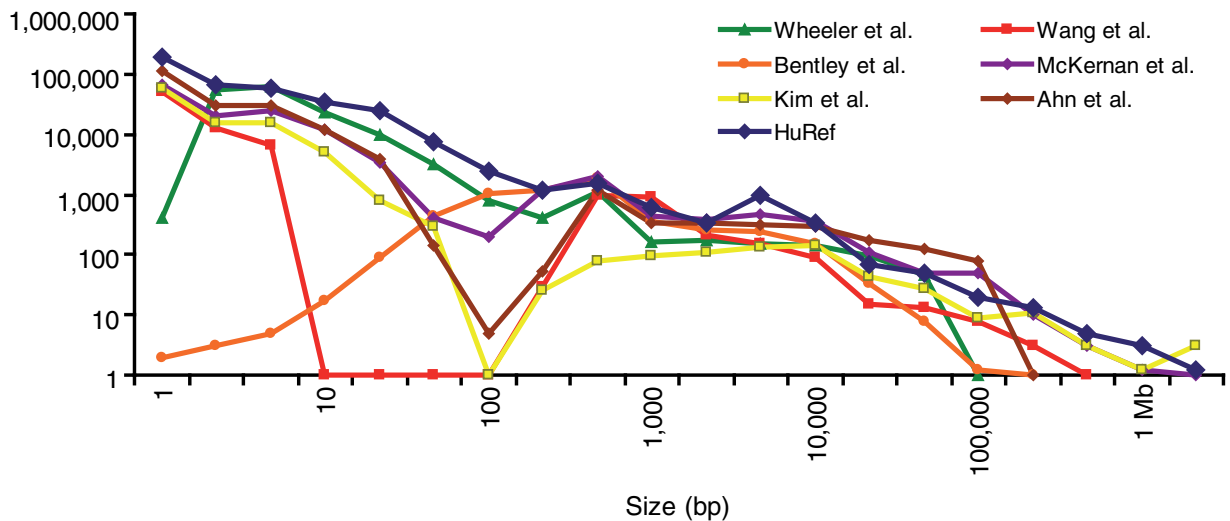

Supplement: 13059_2010_2345_MOESM31_ESM.pdf [file 13059_2010_2345_MOESM31_ESM.pdf]

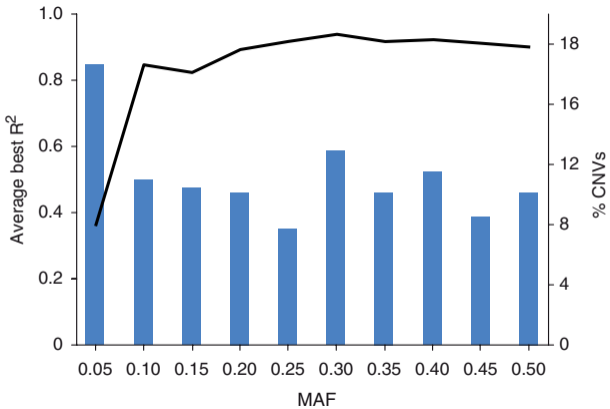

Supplement: 13059_2010_2345_MOESM32_ESM.pdf [file 13059_2010_2345_MOESM32_ESM.pdf]
